# Supplementary material
Source: ML conference proceedings conference paper supplement (https://aclanthology.org/2024.semeval-1.81)
Supplement: SupplementaryMaterial [file 2024.semeval-1.81.SupplementaryMaterial.zip]

## Emotion Recognition with whole labels

### Job Description

Now you are expert of sentiment and emotional analysis. The following conversation noted between involves several speakers.

### Historical content

Speaker\_0: "Oh my God !"  
Speaker\_1: "I know , I know , I am such an idiot ."

historical  
window

Speaker\_1: "Me , I ... I went for the watch ."

Speaker\_0: "You actually broke her watch ?"

### Label Statement

Please select the emotional label of < Speaker\_0: "You actually broke her watch ?"> from <neutral, surprise, fear, sadness, joy, disgust, anger>

## Emotion Recognition for positive utterances

### Job Description

Now you are expert of sentiment and emotional analysis. The following conversation noted between involves several speakers.

### Historical content

Speaker\_0: "Oh my God !"  
Speaker\_1: "I know , I know , I am such an idiot ."

historical  
window

Speaker\_1: "Me , I ... I went for the watch ."

Speaker\_0: "You actually broke her watch ?"

### Label Statement

Please select the emotional label of < Speaker\_0: "You actually broke her watch ?"> from <surprise, joy>

## Emotion Recognition with sub-labels

### Job Description

Now you are expert of sentiment and emotional analysis. The following conversation noted between involves several speakers.

### Historical content

Speaker\_0: "Oh my God !"  
Speaker\_1: "I know , I know , I am such an idiot ."

historical  
window

Speaker\_1: "Me , I ... I went for the watch ."

Speaker\_0: "You actually broke her watch ?"

### Label Statement

Please select the emotional label of < Speaker\_0: "You actually broke her watch ?"> from <neutral, positive, negative>

## Emotion Recognition for negative utterances

### Job Description

Now you are expert of sentiment and emotional analysis. The following conversation noted between involves several speakers.

### Historical content

Speaker\_1: "I knew ."  
Speaker\_0: "You did ! Oh ..."

historical  
window

Speaker\_1: "I did ."

Speaker\_0: "Oh ."

### Label Statement

Please select the emotional label of < Speaker\_0: "Oh ."> from < fear, sadness, disgust, anger >

## Emotion Recognition for speaker identification

### Job Description

Now you are expert of sentiment and emotional analysis.

### Label Statement

Please select the Speaker label of the utterance <Speaker: You actually broke her watch ?> from <Speaker\_0, Speaker\_1, Speaker\_2, Speaker\_3, Speaker\_4, Speaker\_5, Speaker\_6, Speaker\_7>

## Emotion Recognition with video description

### Job Description

Now you are expert of sentiment and emotional analysis. The background of following conversation is:

### Background description

< In the scene, a group of people is sitting around a coffee table ..... >

### Historical content

Speaker\_1: "Oh , yeah . Had that dream ."

historical  
window

Speaker\_2: "Never had that dream ."

### Movement description

The body movement during utterance < Speaker\_2: "Never had that dream ."> is: <A man sitting on a couch with his arms crossed, listening ...>.

### Personal state description

The personal state of this conversation is: <The man is likely in a relaxed or casual state, as he is sitting comfortably on the couch ...>.

### Label Statement

Please select the emotional label of < Speaker\_0: "Oh ."> from < neutral, surprise, fear, sadness, joy, disgust, anger >
