# Supplementary material
Source: ML conference proceedings conference paper supplement (https://aclanthology.org/2024.semeval-1.81)

## Subtask 1

### Subtask 2

Emotion Recognition

Causal Pair Extraction

Causal Span Extraction

InstructERC model

TSAM model

MuTEC model

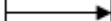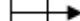

Supplement: SupplementaryMaterial [file 2024.semeval-1.81.SupplementaryMaterial.zip]
